### Baseline characteristics and follow-up outcomes in routine clinical practice patients categorised by renal function in the ETNA-AF-Europe registry

R. De Caterina<sup>1</sup>, M. Gwechenberger<sup>2</sup>, A. Bakhai<sup>3</sup>, P. Monteiro<sup>4</sup>, P. Kelly<sup>5</sup>, P. Levy<sup>6</sup>, P. Kirchhof<sup>7</sup>

<sup>1</sup>University of Pisa, Cardiology, Pisa, Italy; <sup>2</sup>Medical University of Vienna, Vienna, Austria; <sup>3</sup>Royal Free London NHS Foundation Trust, Barnet Hospital, London, United Kingdom; <sup>4</sup>Centro Hospitalar e Universitário de Coimbra, Coimbra, Portugal; <sup>5</sup>University College Dublin, HRB Stroke Clinical Trials Network Ireland, Dublin, Ireland; <sup>6</sup>Amsterdam UMC, University of Amsterdam, Amsterdam, Netherlands (The); <sup>7</sup>University Heart & Vascular Center Hamburg, Hamburg, Germany

On behalf of ETNA-AF-Europe Investigators

**Funding Acknowledgement:** Type of funding source: Private company. Main funding source(s): Daiichi Sankyo Europe GmbH, Munich, Germany

**Background:** Edoxaban is an oral factor Xa inhibitor anticoagulant with 50% renal clearance, and proven efficacy and safety in patients (pts) with atrial fibrillation (AF). The post-authorisation, observational, ETNA-AF-Europe registry (NCT02944019) assessed the risks and benefits of edoxaban in pts with AF from 10 European countries.

**Purpose:** Evaluate baseline characteristics and event rates in pts categorised by creatinine clearance (CrCl) at 1-year follow-up of the ETNA-AF-Europe registry.

**Methods:** In this analysis, pts were divided into three groups according to CrCl: ≤50 mL/min (I), 50–80 mL/min (II) and ≥80 mL/min (III) (calculated using Cockcroft-Gault). Outcomes were descriptively analysed.

**Results:** Pts with the lowest CrCl (Group I) were mostly females, and had

a higher mean age, lower body weight, higher stroke and bleeding risk scores and were considered more frail than those with higher CrCl (Groups II and III) (Table). Group I experienced higher rates of stroke or SEE, major or CRNM bleeding, cardiovascular death, and had a higher total mortality (Figure). Rates of intracranial haemorrhage (ICH) and haemorrhagic stroke (intracerebral and subarachnoid haemorrhage) were low and similar in pts across the range of CrCl.

**Conclusions:** Those with lower CrCl had more comorbidities and higher event rates than those with higher CrCl, with the exception of ICH and haemorrhagic stroke. A steep rise in the proportion of pts perceived as frail and in overall mortality in the lowest renal function tertile, raises the question whether low renal function is a determinant or a correlate of mortality.

| Baseline characteristics<br>n (%) or mean ± SD | ETNA-AF-Europe<br>Overall | CrCl ≤50 mL/min<br>(Group 1) | CrCl >50, <80 mL/min<br>(Group 2) | CrCl ≥80 mL/min<br>(Group 3) |
|------------------------------------------------|---------------------------|------------------------------|-----------------------------------|------------------------------|
| Patients                                       | 13092 (100.0)             | 2394 (21.0)                  | 4876 (42.8)                       | 4112 (36.1)                  |
| Male                                           | 7430 (56.8)               | 932 (38.9)                   | 2651 (54.4)                       | 2820 (68.6)                  |
| Age, years                                     | 73.6±9.5                  | 81.7±6.4                     | 75.7±6.8                          | 66.7±9.0                     |
| Weight, kg                                     | 81.0±17.3                 | 68.5±12.6                    | 77.0±12.7                         | 92.2±17.5                    |
| CrCl±CG, mL/min                                | 74.3±30.4                 | 39.6±7.5                     | 64.8±8.4                          | 105.6±25.6                   |
| CHA <sub>2</sub> DS <sub>2</sub> -VASc         | 3.1±1.4                   | 4.0±1.2                      | 3.3±1.3                           | 2.4±1.3                      |
| Modified HAS-BLED                              | 2.5±1.1                   | 3.0±1.0                      | 2.7±1.1                           | 2.2±1.1                      |
| Frailty                                        | 1392 (10.6)               | 666 (27.8)                   | 506 (10.4)                        | 157 (3.8)                    |
| Paroxysmal AF                                  | 7039 (53.9)               | 1153 (48.3)                  | 2576 (52.9)                       | 2271 (55.3)                  |
| Persistent AF                                  | 3159 (24.2)               | 546 (22.9)                   | 1188 (24.4)                       | 1102 (26.8)                  |
| Long-standing persistent & permanent AF        | 2864 (21.9)               | 690 (28.9)                   | 1102 (22.6)                       | 732 (17.8)                   |

\*Frailty reported as perceived by the investigator. AF, atrial fibrillation; CG, Cockcroft-Gault equation; CrCl, creatinine clearance.

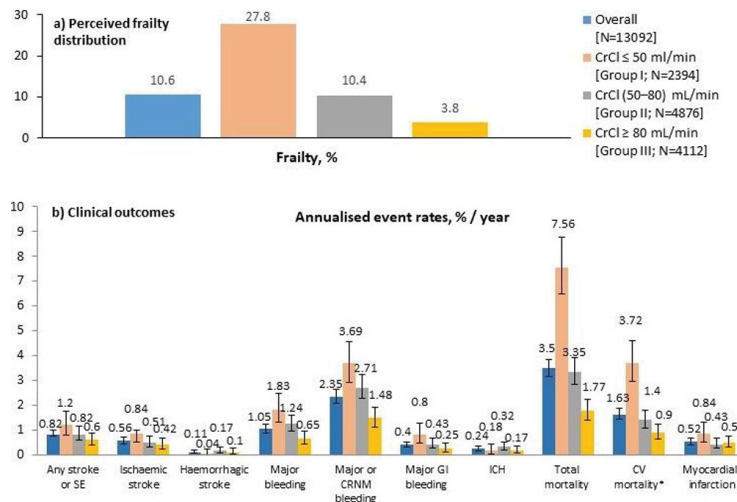

\*Sensitivity analysis. CrCl, creatinine clearance; CRNM, clinically relevant nonmajor; CV, cardiovascular; GI, gastrointestinal; ICH, intracranial haemorrhage; SE, systemic embolism.

Downloaded from https://academic.oup.com/eurheartj/article/41/Supplement\_2/ehaa946.0637/6004679 by guest on 23 April 2024
